# Supplementary material for: Cardiovascular disease risk in patients with inflammatory arthritis nowadays still substantially elevated
Source: PubMed Central journal article supplement — RMD Open. 2023 Dec 1;9(4):e003485. doi: 10.1136/rmdopen-2023-003485 (PMC10693884; doi:10.1136/rmdopen-2023-003485), 2023-12-01
Supplement: rmdopen-2023-003485supp001.pdf [file rmdopen-2023-003485supp001.pdf]

## Supplementary material

| Variable                               | OR (model 1)          | p-value | OR (model 2)           | p-value | OR (model 3)           | p-value |
|----------------------------------------|-----------------------|---------|------------------------|---------|------------------------|---------|
| RA                                     | 1.27<br>(0.81 - 1.99) | 0.29    | 0.95<br>(0.58 - 1.55)  | 0.85    | 0.97<br>(0.60 - 1.57)  | 0.91    |
| PsA                                    | 1.68<br>(0.96 - 2.96) | 0.07    | 1.19<br>(0.64 - 2.22)  | 0.58    | 1.37<br>(0.75 - 2.52)  | 0.31    |
| SpA                                    | 1.49<br>(0.80 - 2.76) | 0.21    | 0.91<br>(0.47 - 1.77)  | 0.78    | 1.05<br>(0.56 - 2.00)  | 0.87    |
| Age                                    | 1.08<br>(1.06 - 1.10) | <0.001  | 1.04<br>(1.02 - 1.06)  | 0.001   | -                      | -       |
| Sex (male)                             | 2.60<br>(1.81 - 3.74) | <0.001  | 2.34<br>(1.57 - 3.49)  | <0.001  | -                      | -       |
| BMI                                    | -                     | -       | 1.01<br>(0.97 - 1.06)  | 0.52    | 1.01<br>(0.97 - 1.05)  | 0.61    |
| Hypertension                           | -                     | -       | 3.66<br>(2.25 - 5.95)  | <0.001  | 4.06<br>(2.52 - 6.61)  | <0.001  |
| Dyslipidemia                           | -                     | -       | 7.10<br>(4.20 - 12.02) | <0.001  | 9.30<br>(5.53 - 15.65) | <0.001  |
| Diabetes                               | -                     | -       | 1.20<br>(0.65 - 2.20)  | 0.56    | 1.25<br>(0.69 - 2.27)  | 0.47    |
| Smoking (Quit)                         | -                     | -       | 1.07<br>(0.70 - 1.63)  | 0.75    | 1.29<br>(0.85 - 1.93)  | 0.23    |
| Smoking<br>(Current, < 1x<br>per week) | -                     | -       | 0.45<br>(0.05 - 3.73)  | 0.46    | 0.55<br>(0.07 - 4.34)  | 0.57    |
| Smoking<br>(Current, > 1x<br>per week) | -                     | -       | 0.55<br>(0.23 - 1.31)  | 0.18    | 0.63<br>(0.27 - 1.46)  | 0.28    |

**Supplementary Table S1:** Association models. RA = rheumatoid arthritis, PsA = psoriatic arthritis, SpA = (axial) spondyloarthritis, BMI = body mass index, OR = odds ratio.
